# Supplementary material for: Quantitative Analysis of Root System Architecture and Fresh Weight Biomass Traits Highlight Phenotypic Variation in Radish (Raphanus sativus L.) Germplasm
Source: Research Square preprint supplement (doi:10.21203/rs.3.rs-7460160/v1), 2025-09-12
Supplement: Supplementary file 1 [file f3ab35c5ef57bbfd87b95d12.docx]

**Additional file 2. Summary of mean values and standard deviations (SD) of root phonotypic characteristics across the radish germplasms.**

| **Accession** | **Root Length (cm)** | **Projected Area (cm2)** | **Surface Area (cm2)** | **Average Diameter (cm)** | **Root Volume (cm3)** | **Number of root Tips (n)** | **Forks (n)** | **Number of Crossings (n)** |
| --- | --- | --- | --- | --- | --- | --- | --- | --- |
| 1. PI140433 | 917.55 (73.93) | 28.68 (2.08) | 90.10 (6.54) | 0.31 (0.03) | 0.71 (0.09) | 3356.00 (718.01) | 5517.67 (841.04) | 1297.67 (305.74) |
| 1. Scarlet globe | 96.78 (51.78) | 6.29 (1.41) | 19.75 (4.44) | 0.75 (0.30) | 0.35 (0.06) | 887.67 (362.33) | 477.00 (345.76) | 79.00 (65.38) |
| 1. Puthan Red | 557.31 (385.26) | 15.98 (11.13) | 50.21 (34.96) | 0.29 (0.00) | 0.36 (0.25) | 2872.67 (134.64) | 3699.00 (2808.16) | 890.67 (787.40) |
| 1. CHN-AWS-1994-5765 | 49.9 (6.02) | 7.48 (0.83) | 23.50 (2.61) | 1.51 (0.27) | 0.90 (0.25) | 551.33 (112.83) | 242.00 (27.71) | 31.00 (6.08) |
| 1. Ranniy Krasniy | 52.76 (16.42) | 6.14 (1.10) | 19.27 (3.46) | 1.22 (0.34) | 0.58 (0.16) | 536.33 (300.46) | 153.67 (67.26) | 23.67 (12.66) |
| 1. Yingtao luobo 115 | 209.61 (103.45) | 10.89 (2.24) | 34.21 (7.04) | 0.57 (0.19) | 0.48 (0.16) | 1584.33 (494.74) | 817.33 (318.11) | 148.33 (74.39) |
| 1. Dunganskiy | 50.14 (24.08) | 7.32 (0.23) | 23.00 (0.73) | 1.66 (0.65) | 0.95 (0.36) | 550.67 (313.25) | 178.33 (19.40) | 20.33 (4.51) |
| 1. Chempion | 339.85 (261.11) | 13.02 (4.95) | 40.90 (15.56) | 0.46 (0.15) | 0.43 (0.01) | 2200.00 (1211.58) | 1598.00 (1589.41) | 341.67 (394.94) |
| 1. UZB-GJG-2009-10/3-13 | 68.83 (27.11) | 8.01 (1.83) | 25.16 (5.73) | 1.21 (0.24) | 0.75 (0.17) | 737.67 (279.94) | 297.67 (113.52) | 45.33 (28.50) |
| 1. Ying tiao shui luobo | 1031.32 (154.17) | 28.53 (3.18) | 89.63 (10.00) | 0.28 (0.02) | 0.62 (0.07) | 4874.33 (641.91) | 6624.67 (1636.46) | 1579.67 (27.36) |
| 1. Kruglaya chernaya | 47.75 (21.48) | 8.60 (0.55) | 27.01 (1.73) | 2.01 (0.74) | 1.35 (0.46) | 417.33 (232.91) | 209.00 (55.44) | 33.00 (12.77) |
| 1. Kisumi ― hatsukadaikon | 137.40 (55.59) | 8.65 (0.57) | 27.17 (1.79) | 0.70 (0.26) | 0.47 (0.15) | 1112.33 (438.29) | 697.33 (437.54) | 132.00 (107.35) |
| 1. Akamaruwatsuka | 62.72 (25.52) | 6.68 (1.09) | 21.00 (3.43) | 1.16 (0.38) | 0.60 (0.15) | 536.00 (163.56) | 264.33 (124.09) | 37.67 (26.10) |
| 1. Yingtao meiren | 927.76 (252.58) | 27.22 (5.89) | 85.51 (18.51) | 0.30 (0.02) | 0.63 (0.10) | 3576.67 (920.44) | 5305.67 (2089.90) | 1314.00 (583.18) |
| 1. Hong bai 20 ri | 27.38 (4.91) | 6.01 (0.78) | 18.893 (2.46) | 2.22 (0.36) | 1.06 (0.26) | 290.00 (109.23) | 96.33 (37.61) | 9.33 (4.93) |
| 1. Nihon oto luobo | 414.64 (266.10) | 15.37 (5.82) | 48.29 (18.30) | 0.41 (0.10) | 0.47 (0.11) | 2077.67 (907.69) | 2120.67 (1313.32) | 490.00 (384.00) |
| 1. Hong yingtao luobo | 1047.78 (361.94) | 32.64 (7.88) | 102.54 (24.76) | 0.32 (0.04) | 0.81 (0.15) | 5135.67 (2167.97) | 8774.67 (2420.05) | 1906.67 (617.79) |
| 1. HA17 | 34.89 (13.08) | 3.96 (1.25) | 12.44 (3.91) | 1.16 (0.13) | 0.36 (0.09) | 343.67 (264.21) | 123.33 (54.12) | 16.33 (13.28) |
| 1. Kvarta | 540.36 (134.02) | 17.80 (2.70) | 55.91 (8.46) | 0.34 (0.04) | 0.46 (0.04) | 2935.00 (708.02) | 4103.67 (1702.18) | 937.67 (417.03) |
| 1. Krakovyanka | 80.01 (50.87) | 6.57 (0.52) | 20.62 (1.62) | 1.24 (1.02) | 0.61 (0.45) | 866.67 (594.75) | 277.33 (203.98) | 48.67 (37.01) |
| 1. Negrityanka | 364.66 (142.52) | 17.25 (3.62) | 54.18 (11.38) | 0.50 (0.09) | 0.66 (0.05) | 2138.33 (624.58) | 2950.67 (1528.89) | 567.33 (355.05) |
| 1. CHERISH-1 | 602.54 (102.75) | 20.20 (3.30) | 63.45 (10.37) | 0.34 (0.02) | 0.53 (0.09) | 3019.67 (1033.54) | 4602.67 (1364.14) | 974.33 (290.13) |
| 1. AS20DOR | 499.39 (164.51) | 18.36 (4.42) | 57.68 (13.90) | 0.38 (0.04) | 0.53 (0.08) | 2325.67 (644.07) | 3840.67 (1266.83) | 851.00 (373.24) |

SD are provided in parentheses.

**Additional file 2. Summary of mean values and standard deviations (SD) of root phonotypic characteristics across the radish germplasms (Cont’d).**

| **Accession** | **Average Length of Link (cm)** | **Average Projected Area of Link (cm2)** | **Average Surface Area of Link (cm2)** | **Average Diameter of Link (cm)** | **Average Branching Angle of Link (°)** | **Shoot Fresh Weight (g)** | **Root Fresh Weight (g)** | **Root-Shoot fresh weight ratio (g)** |
| --- | --- | --- | --- | --- | --- | --- | --- | --- |
| 1. PI140433 | 0.10 (0.01) | 0.003 (0.00) | 0.01 (0.00) | 0.35 (0.03) | 56.77 (0.55) | 11.37 (1.85) | 3.73 (1.67) | 0.32 (0.09) |
| 1. Scarlet globe | 0.09 (0.01) | 0.01 (0.00) | 0.02 (0.01) | 0.28 (0.08) | 51.63 (2.88) | 16.33 (3.12) | 9.90 (3.11) | 0.60 (0.08) |
| 1. Puthan Red | 0.08 (0.01) | 0.002 (0.00) | 0.01 (0.00) | 0.27 (0.01) | 55.58 (1.58) | 6.60 (.50) | 0.97 (0.06) | 0.31 (0.35) |
| 1. CHN-AWS-1994-5765 | 0.08 (0.00) | 0.01 (0.00) | 0.04 (0.01) | 0.30 (0.04) | 52.21 (2.99) | 14.00 (2.07) | 8.47 (1.93) | 0.60 (0.08) |
| 1. Ranniy Krasniy | 0.12 (0.05) | 0.01 90.00) | 0.03 (0.01) | 0.35 (0.12) | 49.69 (1.35) | 12.90 (2.08) | 9.93 (4.68) | 0.75 (0.22) |
| 1. Yingtao luobo 115 | 0.11 (0.01) | 0.01 (0.00) | 0.02 (0.00) | 0.36 (0.01) | 54.09 (0.53) | 14.27 (0.49) | 7.67 (0.50) | 0.54 (0.03) |
| 1. Dunganskiy | 0.10 (0.01) | 0.01 (0.00) | 0.04 (0.01) | 0.41 (0.07) | 49.84 (4.49) | 13.87 (1.60) | 7.63 (0.76) | 0.55 (0.02) |
| 1. Chempion | 0.11 (0.01) | 0.01 (0.00) | 0.02 (0.01) | 0.32 (0.05) | 54.48 (0.80) | 18.53 (3.88) | 9.47 (1.63) | 0.52 (0.07) |
| 1. UZB-GJG-2009-10/3-13 | 0.09 (0.00) | 0.01 90.00) | 0.03 (0.01) | 0.26 (0.04) | 52.66 (2.29) | 19.43 (0.64) | 13.23 (0.61) | 0.68 (0.24) |
| 1. Ying tiao shui luobo | 0.09 (0.02) | 0.002 (0.00) | 0.01 (0.00) | 0.28 (0.02) | 56.04 (0.90) | 13.77 (2.71) | 0.73 (0.15) | 0.05 (0.00) |
| 1. Kruglaya chernaya | 0.11 (0.01) | 0.02 (0.01) | 0.05 (0.02) | 0.50 (0.10) | 51.92 (3.31) | 14.90 (1.49) | 9.53 (0.67) | 0.64 (0.02) |
| 1. Kisumi ― hatsukadaikon | 0.10 (0.02) | 0.01 (0.01) | 0.02 (0.01) | 0.32 (0.11) | 54.13 (2.94) | 15.53 (0.35) | 9.13 (0.95) | 0.59 (0.07) |
| 1. Akamaruwatsuka | 0.11 (0.02) | 0.01 (0.01) | 0.03 (0.02) | 0.46 (0.25) | 50.44 (1.93) | 12.20 (2.21) | 7.93 (1.36) | 0.65 (0.02) |
| 1. Yingtao meiren | 0.10 (0.01) | 0.003 90.00) | 0.01 (0.00) | 0.31 (0.02) | 37.68 (32.64) | 12.20 (0.96) | 1.70 (0.44) | 0.14 (0.03) |
| 1. Hong bai 20 ri | 0.10 (0.02) | 0.02 (0.01) | 0.06 (0.04) | 0.33 90.02) | 48.05 (3.18) | 15.90 (3.21) | 12.00 (2.14) | 0.76 (0.04) |
| 1. Nihon oto luobo | 0.10 (0.01) | 0.004 (0.00) | 0.01 (0.00) | 0.29 (0.01) | 55.63 (0.73) | 13.73 (2.32) | 7.70 (1.78) | 0.56 (0.05) |
| 1. Hong yingtao luobo | 0.07 (0.00) | 0.002 (0.00) | 0.01 (0.00) | 0.34 (0.04) | 56.92 (0.17) | 10.70 (0.35) | 7.63 (0.40) | 0.71 (0.02) |
| 1. HA17 | 0.11(0.03) | 0.01 (0.01) | 0.03 (0.01) | 0.28 (0.06) | 48.28 (3.26) | 12.47 (0.65) | 7.27 (0.15) | 0.58 (0.04) |
| 1. Kvarta | 0.08 (0.01) | 0.003 (0.00) | 0.01 (0.00) | 0.34 (0.05) | 56.84 (1.11) | 11.57 (0.61) | 2.27 (0.15) | 0.20 (0.02) |
| 1. Krakovyanka | 0.10 (0.01) | 0.01 (0.01) | 0.04 (0.03) | 0.22 (0.06) | 52.33 (3.77) | 9.43 (1.38) | 7.07 (1.29) | 0.75 (0.07) |
| 1. Negrityanka | 0.08 (0.01) | 0.003 (0.00) | 0.01 (0.00) | 0.36 (0.11) | 56.86 (0.97) | 20.43 (4.57) | 10.70 (3.38) | 0.56 (0.30) |
| 1. CHERISH-1 | 0.08 (0.01) | 0.003 (0.00) | 0.01 (0.00) | 0.33 (0.03) | 56.66 (0.27) | 15.63 (2.02) | 3.27 (0.31) | 0.21 (0.02) |
| 1. AS20DOR | 0.08 (0.01) | 0.003 (0.00) | 0.01(0.00) | 0.36 (0.01) | 56.66 (0.66) | 13.03 (2.11) | 5.00 (0.85) | 0.40 (0.13) |

SD are provided in parentheses.
